# Supplementary material
Source: publisher figshare collection journal article supplement (https://acs.figshare.com/ndownloader/files/4535620)
Supplement: Supplementary file 1 [file 4535620]

## Supporting information for:

### Pt Nanoparticles Inserting in Carbon Nanotubes Arrays Nanocomposites for Glucose Biosensors

Zhenhai Wen<sup>a,b</sup>, Suqin Ci<sup>a</sup>, Jinghong Li<sup>b,\*</sup>

<sup>a</sup>*School of Environment and Chemical Engineering, Nanchang Hangkong University, Nanchang, 330063, China*

<sup>b</sup>*Department of Chemistry, Key Lab of Bioorganic Phosphorus Chemistry & Chemical Biology, Tsinghua University, Beijing 100084, China*

\*Corresponding author. Tel.: +86 10 6279 5290; Fax: +86 10 6277 1149

E-mail: jhli@mail.tsinghua.edu.cn

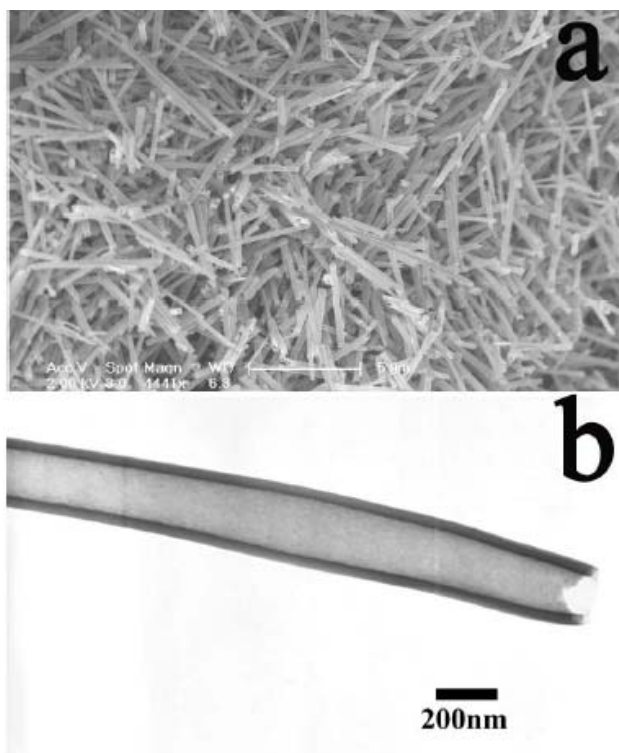

**Figure S1.** SEM (a) and TEM (b) images of the CNTs prepared through in the present method.

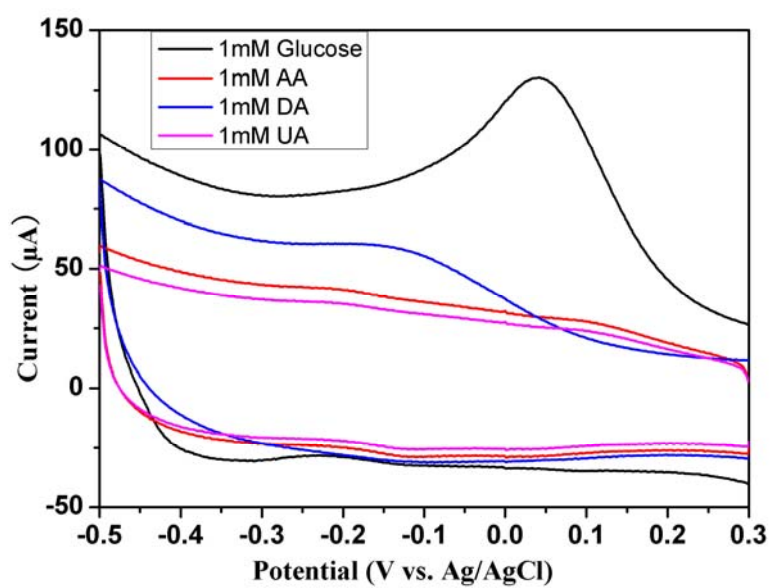

**Figure S2.** Cyclic voltammograms of 1 m M DA, UA, AA and 1 mM glucose at the Pt-CNTs-GOD electrode in pH 7.0 PBS solution respectively.
